# Supplementary material for: Protection of Citrus Fruits from Postharvest Infection with Penicillium digitatum and Degradation of Patulin by Biocontrol Yeast Clavispora lusitaniae 146
Source: MDPI journal article supplement (doi:10.3390/microorganisms8101477), 2020-09-25
Supplement: s1 [file s1]

**Table S1:** Tabulated values of  $\chi^2$  statistic according to Amerine et al. [53].

|                           | 5%   | 1%   | 0.1%  |
|---------------------------|------|------|-------|
| One-sided<br>(difference) | 2.71 | 5.41 | 9.55  |
| Two-sided<br>(preference) | 3.84 | 6.64 | 10.83 |

Formula used for  $\chi^2$  test:

$$\chi_c^2 = \sum \frac{(O_i - E_i)^2}{E_i}$$

## Reference

53. Amerine, M.A.; Pangborn, R.M; Roessler, E.B. Statistical Procedures. In *Principles of sensory evaluation of food*; Amerine, M.A.; Pangborn, R.M; Roessler, E.B.; Elsevier: Netherlands, 1965; pp. 437–493, doi: 10.1016/C2013-0-08103-0.
